# Supplementary material for: Gemcitabine-based chemotherapy as a viable option for treatment of advanced breast cancer patients: a meta-analysis and literature review
Source: PubMed Central journal article supplement (PMC5805543; doi:10.18632/oncotarget.23426), 2017-12-19
Supplement: oncotarget-09-7148-s001.pdf [file oncotarget-09-7148-s001.pdf]

# Gemcitabine-based chemotherapy as a viable option for treatment of advanced breast cancer patients: a meta-analysis and literature review

## SUPPLEMENTARY MATERIALS

**Supplementary Table 1: Quality analysis of included studies**

| Index                                                                                   | No. 1 | No. 2 | No. 3 | No. 4 | No. 5 | No. 6 | No. 7 | No. 8 | No. 9 | No. 10 | No. 11 | No. 12 | No. 13 | No. 14 | No. 15 |
|-----------------------------------------------------------------------------------------|-------|-------|-------|-------|-------|-------|-------|-------|-------|--------|--------|--------|--------|--------|--------|
| Was the method of randomization adequate?                                               | Y     | Y     | Y     | Y     | Y     | Y     | Y     | Y     | Y     | Y      | Y      | Y      | Y      | Y      | Y      |
| Was the treatment allocation concealed?                                                 | U     | U     | Y     | U     | U     | U     | Y     | Y     | U     | N      | N      | Y      | N      | Y      | Y      |
| Were the groups similar at baseline regarding the most important prognostic indicators? | Y     | U     | Y     | Y     | Y     | U     | Y     | Y     | U     | Y      | U      | Y      | Y      | Y      | N      |
| Was the patient blinded to the intervention?                                            | N     | N     | N     | N     | N     | N     | N     | N     | N     | N      | N      | N      | N      | N      | N      |
| Was the care provider blinded to the intervention?                                      | N     | N     | N     | N     | N     | N     | N     | N     | N     | N      | N      | N      | N      | N      | N      |
| Was the outcome assessor blinded to the intervention?                                   | N     | N     | N     | N     | N     | N     | N     | N     | N     | N      | N      | N      | N      | N      | N      |
| Were co-interventions avoided or similar?                                               | Y     | Y     | Y     | Y     | Y     | Y     | Y     | Y     | Y     | Y      | Y      | Y      | Y      | Y      | Y      |
| Was the compliance acceptable in all groups?                                            | Y     | Y     | Y     | Y     | Y     | Y     | Y     | Y     | Y     | Y      | Y      | Y      | Y      | Y      | Y      |
| Was the drop-out rate described and acceptable?                                         | Y     | Y     | Y     | Y     | Y     | Y     | U     | Y     | Y     | Y      | U      | Y      | Y      | Y      | U      |
| Was the timing of the outcome assessment in all groups similar?                         | Y     | Y     | Y     | Y     | Y     | Y     | Y     | Y     | Y     | Y      | Y      | Y      | Y      | Y      | Y      |
| Did the analysis include an intention-to-treat analysis?                                | Y     | U     | Y     | Y     | Y     | Y     | U     | Y     | Y     | Y      | U      | Y      | Y      | Y      | N      |

Notes: Y = Yes; N = No; U = Unclear.

Study: No.1 = Albain *et al.*; No.2 = Amadori *et al.*; No.3 = Brufsky *et al.*; No.4 = Chan *et al.*; No.5 = Fountzilias *et al.*; No.6 = Gómez *et al.*; No.7 = Joensuu *et al.*; No.8 = Martín *et al.*; No.9 = Nielsen *et al.*; No.10 = Pallis *et al.*; No.11 = Papadimitriou *et al.*; No.12 = Park *et al.*; No.13 = Swain *et al.*; No.14 = Vici *et al.*; No.15 = Zielinski *et al.*

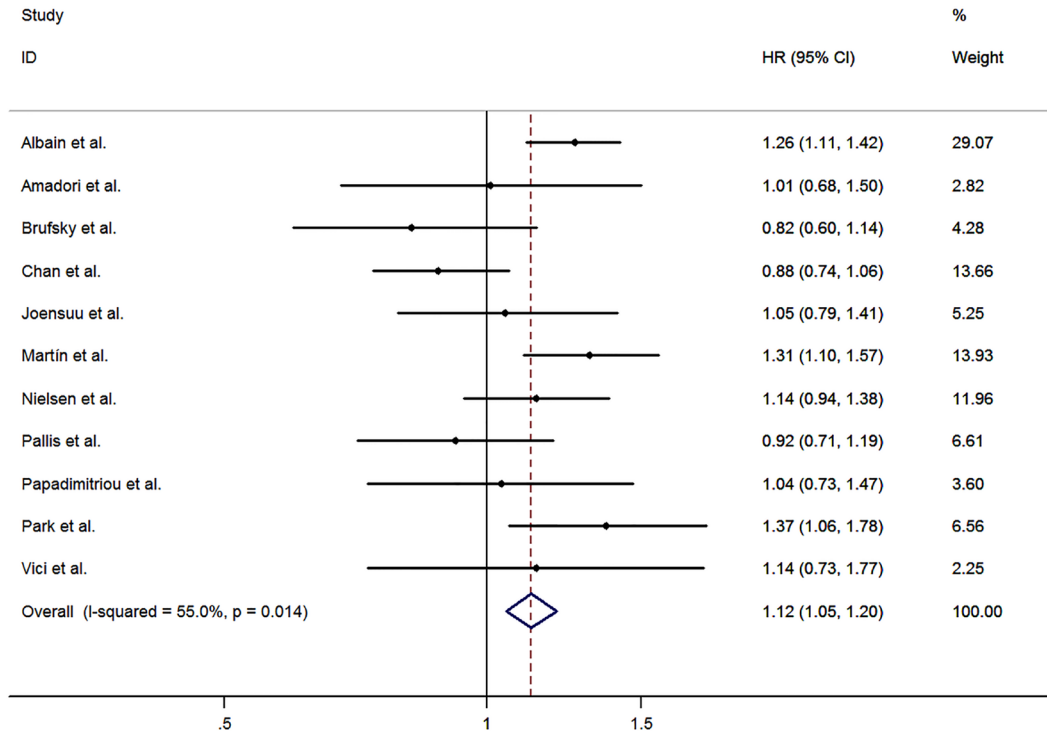

**Supplementary Figure 1: Comparisons of progression free survivals between 2 arms after excluding the study with the high risk of bias (Zielinski *et al.*).**

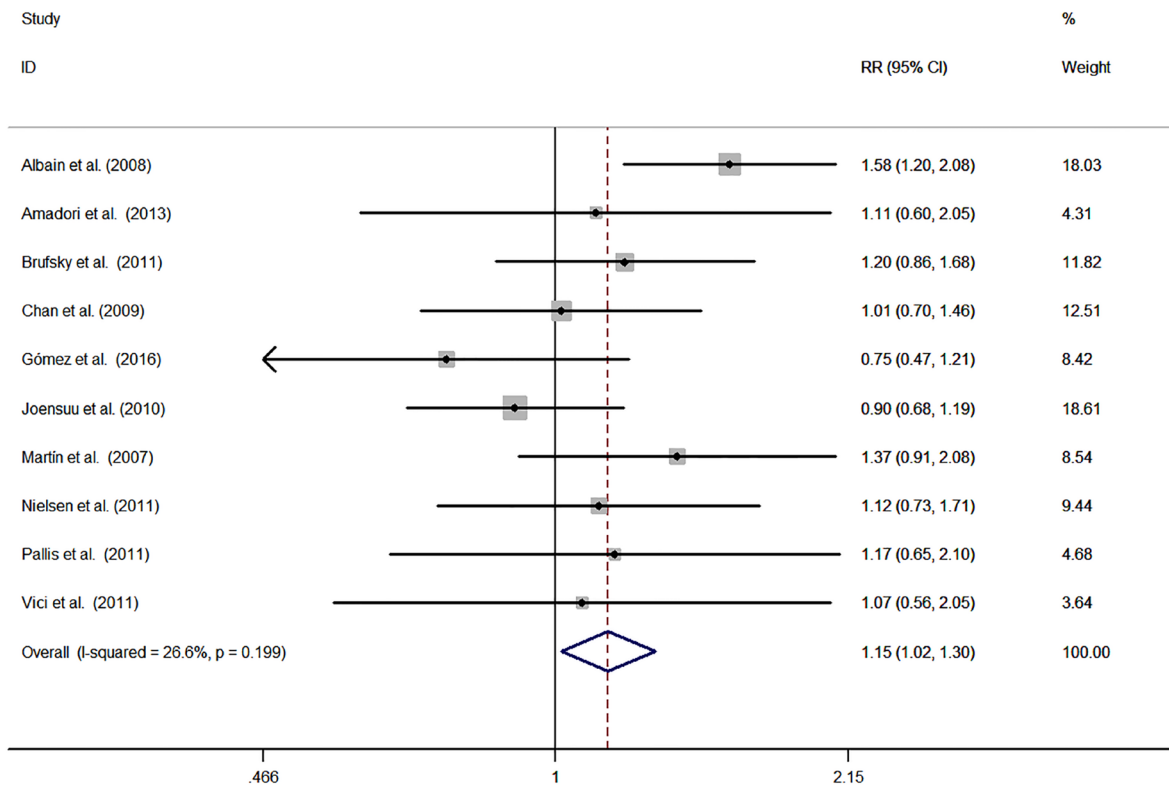

**Supplementary Figure 2: Comparisons of objective tumor response rate between 2 arms after excluding the study with the high risk of bias (Zielinski *et al.*).**

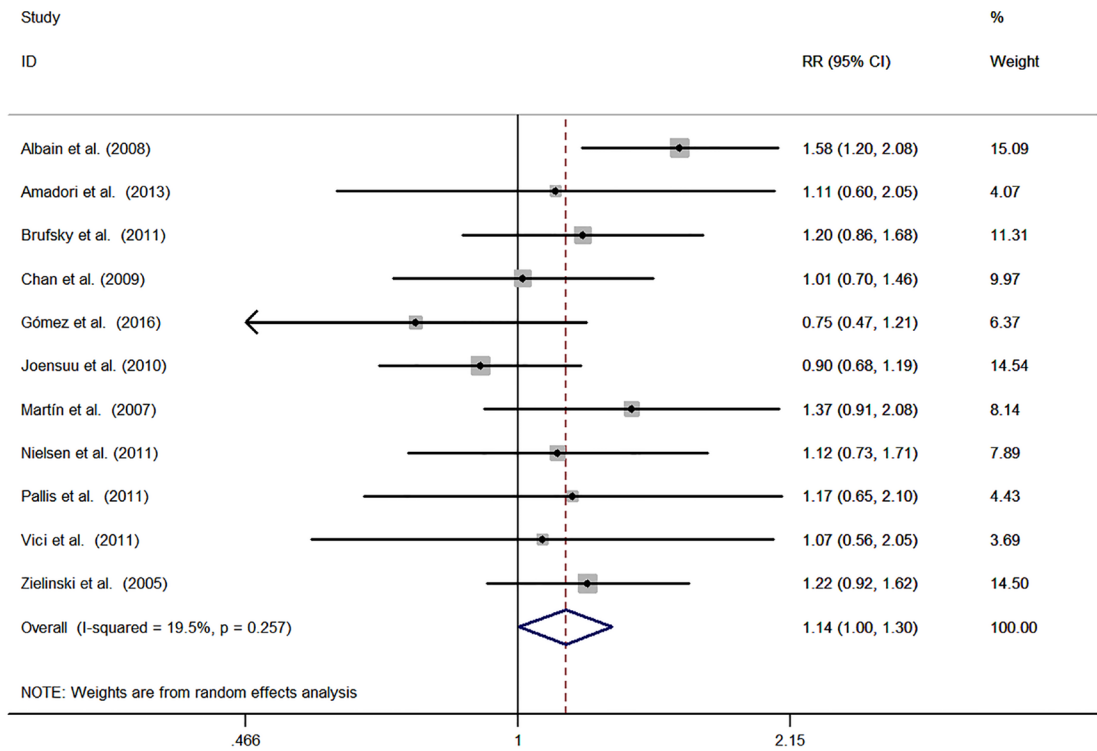

Supplementary Figure 3: Comparisons of objective tumor response rate between 2 arms with random-model.

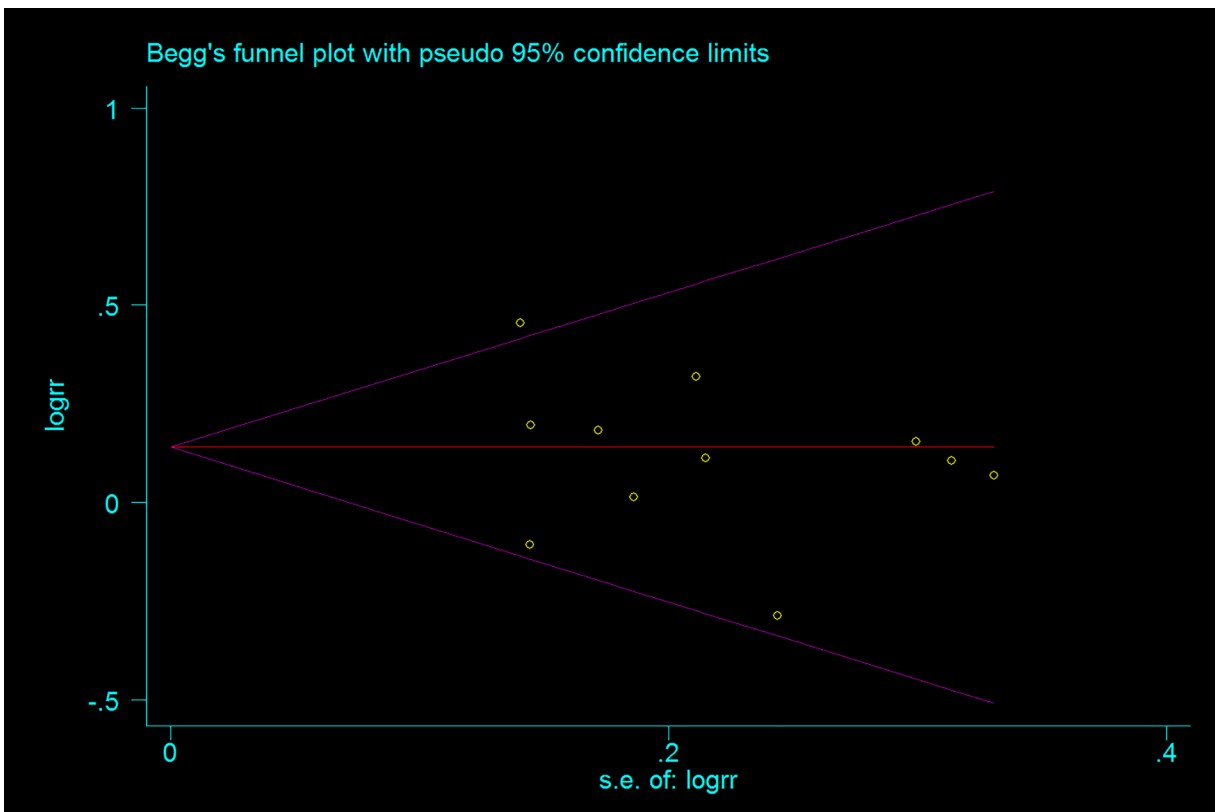

Supplementary Figure 4: Funnel plots of objective tumor response rate between patients with gemcitabine-containing regimens and patients with non- gemcitabine-containing regimens (Egger's tests).
